# Supplementary material for: In vitro and in vivo efficacy, toxicity, bio-distribution and resistance selection of a novel antibacterial drug candidate
Source: PubMed Central journal article supplement (PMC4864329; doi:10.1038/srep26077), 2016-05-12
Supplement: srep26077-s1.pdf [file srep26077-s1.pdf]

## **In vitro and in vivo efficacy, toxicity, bio-distribution and resistance selection of a novel antibacterial drug candidate**

Jlenia Brunetti,<sup>a</sup> Chiara Falciani,<sup>b</sup> Giulia Roscia,<sup>a</sup> Simona Pollini,<sup>a</sup> Stefano Bindi,<sup>a,c</sup> Silvia Scali,<sup>a</sup> Unai Cossio Arrieta,<sup>d</sup> Vanessa Gómez-Vallejo,<sup>d</sup> Leila Quercini,<sup>a</sup> Elisa Ibba,<sup>a</sup> Marco Prato,<sup>e</sup> Gian Maria Rossolini,<sup>a,e,f,g</sup> Jordi Llop,<sup>d</sup> Luisa Bracci,<sup>a,c</sup> and Alessandro Pini,<sup>a,c,\*</sup>

<sup>a</sup> Department of Medical Biotechnologies, University of Siena, Siena, Italy

<sup>b</sup> SetLance srl, via Fiorentina 1, Siena

<sup>c</sup> Clinical Pathology Laboratory, Azienda Ospedaliera Universitaria Senese, Policlinico Le Scotte, viale Bracci, Siena, Italy

<sup>d</sup> Radiochemistry and Nuclear Imaging Group CIC biomaGUNE, San Sebastián, Spain

<sup>e</sup> Department of Experimental and Clinical Medicine, University of Florence, Italy

<sup>f</sup> Microbiology and Virology Unit, Florence Careggi University Hospital, Florence, Italy

<sup>g</sup> Don Carlo Gnocchi Foundation I.R.C.C.S., Florence, Italy

**Table S1.** MIC values for SET-M33L and for colistin as comparator antibiotic and major resistance phenotypes and genotypes of the collection of *P. aeruginosa* clinical isolates.

| Sample ID | MIC SET-M33L |      | MIC colistin |      | Relevant resistance phenotype <sup>a, b</sup> | Relevant resistance genotype |
|-----------|--------------|------|--------------|------|-----------------------------------------------|------------------------------|
|           | µg/mL        | µM   | µg/mL        | µM   |                                               |                              |
| SI_P1     | 8            | 1.4  | ≤0.5         | ≤0.4 | none                                          |                              |
| SI_P2     | 8            | 1.4  | 2            | 1.5  | CARB, β/I, ESC, FQ, AG                        | <i>bla<sub>VIM</sub></i>     |
| SI_P3     | 8            | 1.4  | 2            | 1.5  | none                                          |                              |
| SI_P4     | 8            | 1.4  | ≤0.5         | ≤0.4 | CARB, β/I, ESC, FQ, AG                        |                              |
| SI_P5     | 8            | 1.4  | ≤0.5         | ≤0.4 | CARB, ESC, β/I, FQ, AG                        |                              |
| SI_P6     | 8            | 1.4  | 2            | 1.5  | none                                          |                              |
| SI_P7     | 8            | 1.4  | ≤0.5         | ≤0.4 | CARB, β/I, ESC, FQ, AG                        |                              |
| SI_P8     | 8            | 1.4  | ≤0.5         | ≤0.4 | CARB, ESC, AG                                 |                              |
| SI_P9     | 8            | 1.4  | ≤0.5         | ≤0.4 | CARB, β/I, ESC, FQ, AG                        |                              |
| SI_P10    | 8            | 1.4  | ≤0.5         | ≤0.4 | CARB, β/I, ESC, FQ, AG                        |                              |
| SI_P11    | 8            | 1.4  | 2            | 1.5  | CARB, β/I, ESC, FQ, AG                        |                              |
| SI_P12    | 16           | 2.8  | 2            | 1.5  | CARB, β/I, ESC, FQ                            |                              |
| SI_P13    | 8            | 1.4  | 2            | 1.5  | none                                          |                              |
| SI_P14    | 8            | 1.4  | 2            | 1.5  | CARB                                          |                              |
| SI_P15    | 8            | 1.4  | ≤0.5         | ≤0.4 | CARB, β/I, ESC, FQ, AG                        |                              |
| SI_P16    | 8            | 1.4  | 2            | 1.5  | CARB, β/I, ESC, FQ, AG                        |                              |
| SI_P17    | 8            | 1.4  | ≤0.5         | ≤0.4 | CARB, β/I, ESC, FQ, AG                        | <i>bla<sub>VIM</sub></i>     |
| SI_P18    | 8            | 1.4  | 1            | 0.7  | none                                          |                              |
| SI_P19    | 8            | 1.4  | 2            | 1.5  | none                                          |                              |
| SI_P20    | 8            | 1.4  | ≤0.5         | ≤0.4 | none                                          |                              |
| SI_P21    | 8            | 1.4  | 1            | 0.7  | FQ, AG                                        |                              |
| SI_P22    | 8            | 1.4  | ≤0.5         | ≤0.4 | none                                          |                              |
| SI_P23    | 8            | 1.4  | ≤0.5         | ≤0.4 | none                                          |                              |
| SI_P24    | 8            | 1.4  | ≤0.5         | ≤0.4 | none                                          |                              |
| SI_P25    | 8            | 1.4  | ≤0.5         | ≤0.4 | AG                                            |                              |
| SI_P26    | 8            | 1.4  | ≤0.5         | ≤0.4 | none                                          |                              |
| SI_P27    | 8            | 1.4  | ≤0.5         | ≤0.4 | CARB                                          |                              |
| SI_P28    | 2            | 0.35 | ≤0.5         | ≤0.4 | none                                          |                              |
| SI_P29    | 8            | 1.4  | ≤0.5         | ≤0.4 | none                                          |                              |
| SI_P30    | 8            | 1.4  | ≤0.5         | ≤0.4 | none                                          |                              |
| SI_P31    | 8            | 1.4  | ≤0.5         | ≤0.4 | none                                          |                              |
| SI_P32    | 8            | 1.4  | ≤0.5         | ≤0.4 | none                                          |                              |
| SI_P33    | 4            | 0.7  | ≤0.5         | ≤0.4 | CARB, β/I, ESC, FQ                            |                              |
| SI_P34    | 4            | 0.7  | ≤0.5         | ≤0.4 | CARB, β/I                                     |                              |
| SI_P35    | 8            | 1.4  | 2            | 1.5  | CARB, β/I, ESC, FQ                            |                              |
| SI_P36    | 8            | 1.4  | ≤0.5         | ≤0.4 | CARB, AG                                      |                              |
| SI_P37    | 8            | 1.4  | ≤0.5         | ≤0.4 | CARB, β/I, ESC, FQ, AG                        |                              |
| SI_P38    | 8            | 1.4  | ≤0.5         | ≤0.4 | CARB, β/I, ESC, FQ, AG                        | <i>bla<sub>VIM</sub></i>     |

|        |    |      |      |      |                        |                          |
|--------|----|------|------|------|------------------------|--------------------------|
| SI_P39 | 8  | 1.4  | ≤0.5 | ≤0.4 | CARB, β/I, ESC, FQ, AG | <i>bla<sub>VIM</sub></i> |
| SI_P40 | 16 | 2.8  | ≤0.5 | ≤0.4 | none                   |                          |
| SI_P41 | 8  | 1.4  | ≤0.5 | ≤0.4 | CARB, β/I, ESC, FQ, AG |                          |
| SI_P42 | 8  | 1.4  | ≤0.5 | ≤0.4 | none                   |                          |
| SI_P43 | 8  | 1.4  | ≤0.5 | ≤0.4 | FQ                     |                          |
| SI_P44 | 4  | 0.7  | ≤0.5 | ≤0.4 | CARB, ESC, FQ, AG      |                          |
| SI_P45 | 8  | 1.4  | ≤0.5 | ≤0.4 | none                   |                          |
| SI_P46 | 8  | 1.4  | ≤0.5 | ≤0.4 | none                   |                          |
| SI_P47 | 8  | 1.4  | ≤0.5 | ≤0.4 | none                   |                          |
| SI_P48 | 8  | 1.4  | ≤0.5 | ≤0.4 | none                   |                          |
| SI_P49 | 8  | 1.4  | ≤0.5 | ≤0.4 | CARB, β/I, ESC, FQ, AG |                          |
| SI_P50 | 4  | 0.7  | ≤0.5 | ≤0.4 | none                   |                          |
| SI_P51 | 8  | 1.4  | ≤0.5 | ≤0.4 | CARB, β/I, ESC, FQ, AG |                          |
| SI_P52 | 8  | 1.4  | ≤0.5 | ≤0.4 | CARB, AG               |                          |
| SI_P53 | 8  | 1.4  | ≤0.5 | ≤0.4 | CARB, β/I, ESC, FQ     |                          |
| SI_P54 | 8  | 1.4  | ≤0.5 | ≤0.4 | CARB, β/I, FQ, AG      |                          |
| SI_P55 | 8  | 1.4  | ≤0.5 | ≤0.4 | none                   |                          |
| SI_P56 | 8  | 1.4  | ≤0.5 | ≤0.4 | CARB                   |                          |
| SI_P57 | 4  | 0.7  | ≤0.5 | ≤0.4 | β/I                    |                          |
| SI_P58 | 8  | 1.4  | ≤0.5 | ≤0.4 | FQ, AG                 |                          |
| SI_P59 | 8  | 1.4  | ≤0.5 | ≤0.4 | β/I, ESC               |                          |
| SI_P60 | 8  | 1.4  | 2    | 1.5  | CARB, β/I, ESC, FQ, AG | <i>bla<sub>VIM</sub></i> |
| SI_P61 | 8  | 1.4  | ≤0.5 | ≤0.4 | CARB, β/I, ESC, FQ, AG | <i>bla<sub>VIM</sub></i> |
| SI_P62 | 8  | 1.4  | 2    | 1.5  | CARB, β/I, ESC, FQ, AG | <i>bla<sub>VIM</sub></i> |
| SI_P63 | 8  | 1.4  | ≤0.5 | ≤0.4 | CARB, β/I, ESC, FQ, AG | <i>bla<sub>VIM</sub></i> |
| SI_P64 | 8  | 1.4  | ≤0.5 | ≤0.4 | CARB, β/I, ESC, FQ, AG |                          |
| SI_P65 | 8  | 1.4  | 2    | 1.5  | CARB, β/I, ESC, FQ, AG |                          |
| SI_P66 | 4  | 0.7  | ≤0.5 | ≤0.4 | CARB, FQ               |                          |
| SI_P67 | 8  | 1.4  | ≤0.5 | ≤0.4 | CARB, β/I, ESC, FQ, AG | <i>bla<sub>VIM</sub></i> |
| SI_P68 | 8  | 1.4  | ≤0.5 | ≤0.4 | none                   |                          |
| SI_P69 | 4  | 0.7  | 2    | 1.5  | CARB                   |                          |
| SI_P70 | 4  | 0.7  | ≤0.5 | ≤0.4 | CARB                   |                          |
| SI_P71 | 64 | 11.2 | ≤0.5 | ≤0.4 | none                   |                          |
| SI_P72 | 8  | 1.4  | 2    | 1.5  | FQ, AG                 |                          |
| SI_P73 | 8  | 1.4  | ≤0.5 | ≤0.4 | β/I                    |                          |
| SI_P74 | 8  | 1.4  | ≤0.5 | ≤0.4 | none                   |                          |
| SI_P75 | 8  | 1.4  | 2    | 1.5  | CARB, β/I, ESC, FQ, AG | <i>bla<sub>IMP</sub></i> |
| SI_P76 | 8  | 1.4  | 1    | 0.7  | CARB, β/I, ESC, FQ, AG | <i>bla<sub>IMP</sub></i> |

<sup>a</sup> CARB, carbapenems; β/I, β-lactams/inhibitors combinations; ESC, extended-spectrum cephalosporins; FQ, fluoroquinolones; AG, aminoglycosides.

<sup>b</sup> Non susceptible to at least one agent among the following tested antibiotics: CARB, imipenem and/or meropenem; ESC, ceftazidime and/or cefepime; AG, gentamicin and/or tobramycin and/or amikacin. Resistance phenotype towards β/I and FQ was reported in case of non-susceptibility to piperacillin/tazobactam and ciprofloxacin respectively.

**Table S2.** MIC values for SET-M33L and for colistin as comparator antibiotic and major resistance phenotypes and genotypes of the collection of *K. pneumoniae* clinical isolates.

| Sample ID | MIC SET-M33L |       | MIC colistin |      | Relevant resistance phenotype <sup>a, b</sup> | Relevant resistance genotype |
|-----------|--------------|-------|--------------|------|-----------------------------------------------|------------------------------|
|           | µg/mL        | µM    | µg/mL        | µM   |                                               |                              |
| SI_K1     | 16           | 2.8   | 32           | 24   | CARB, β/I, ESC, FQ, AG, COL                   | <i>bla</i> <sub>NDM</sub>    |
| SI_K2     | 8            | 1.4   | ≤0.5         | ≤0.4 | CARB, ESC, FQ, AG                             | <i>bla</i> <sub>CTX-M</sub>  |
| SI_K3     | 4            | 0.7   | 0.5          | 0.4  | CARB, β/I, ESC, AG                            | <i>bla</i> <sub>VIM</sub>    |
| SI_K4     | 4            | 0.7   | 0.5          | 0.4  | CARB, β/I, ESC, FQ                            | <i>bla</i> <sub>OXA-48</sub> |
| SI_K5     | 4            | 0.7   | 0.5          | 0.4  | CARB, β/I, ESC, FQ                            | <i>bla</i> <sub>OXA-48</sub> |
| SI_K6     | 4            | 0.7   | 0.5          | 0.4  | CARB, β/I, ESC, FQ, AG                        | <i>bla</i> <sub>KPC</sub>    |
| SI_K7     | 4            | 0.7   | 0.5          | 0.4  | CARB, β/I, ESC, FQ                            | <i>bla</i> <sub>KPC</sub>    |
| SI_K8     | 4            | 0.7   | ≤0.5         | ≤0.4 | CARB, β/I, ESC, FQ, AG                        | <i>bla</i> <sub>KPC</sub>    |
| SI_K9     | 8            | 1.4   | 2            | 1.5  | CARB, β/I, ESC, FQ, AG                        | <i>bla</i> <sub>KPC</sub>    |
| SI_K10    | 32           | 5.6   | >32          | >24  | CARB, β/I, ESC, FQ, COL                       | <i>bla</i> <sub>KPC</sub>    |
| SI_K11    | 16           | 2.8   | ≤0.5         | ≤0.4 | CARB, β/I, ESC, FQ, AG                        | <i>bla</i> <sub>KPC</sub>    |
| SI_K12    | 8            | 1.4   | ≤0.5         | ≤0.4 | none                                          |                              |
| SI_K13    | 8            | 1.4   | ≤0.5         | ≤0.4 | β/I, ESC, FQ, AG                              | ESBL <sup>c</sup>            |
| SI_K14    | 8            | 1.4   | ≤0.5         | ≤0.4 | none                                          |                              |
| SI_K15    | 4            | 0.7   | ≤0.5         | ≤0.4 | none                                          |                              |
| SI_K16    | 4            | 0.7   | ≤0.5         | ≤0.4 | none                                          |                              |
| SI_K17    | 64           | 11.2  | >32          | >24  | CARB, β/I, ESC, FQ, AG, COL                   | <i>bla</i> <sub>KPC</sub>    |
| SI_K18    | 8            | 1.4   | ≤0.5         | ≤0.4 | none                                          |                              |
| SI_K19    | 8            | 1.4   | ≤0.5         | ≤0.4 | ESC                                           | ESBL                         |
| SI_K20    | 8            | 1.4   | ≤0.5         | ≤0.4 | none                                          |                              |
| SI_K21    | 4            | 0.7   | ≤0.5         | ≤0.4 | none                                          |                              |
| SI_K22    | 4            | 0.7   | ≤0.5         | ≤0.4 | none                                          |                              |
| SI_K23    | 4            | 0.7   | ≤0.5         | ≤0.4 | none                                          |                              |
| SI_K24    | 4            | 0.7   | ≤0.5         | ≤0.4 | none                                          |                              |
| SI_K25    | 8            | 1.4   | ≤0.5         | ≤0.4 | none                                          |                              |
| SI_K26    | 8            | 1.4   | ≤0.5         | ≤0.4 | none                                          |                              |
| SI_K27    | 8            | 1.4   | ≤0.5         | ≤0.4 | none                                          |                              |
| SI_K28    | 4            | 0.7   | ≤0.5         | ≤0.4 | β/I, ESC, FQ, AG                              | ESBL                         |
| SI_K29    | 8            | 1.4   | 0.5          | 0.4  | ESC, AG                                       | <i>bla</i> <sub>CTX-M</sub>  |
| SI_K30    | 8            | 1.4   | ≤0.5         | ≤0.4 | none                                          |                              |
| SI_K31    | 16           | 2.8   | 16           | 12   | β/I, ESC, FQ, AG, COL                         | ESBL                         |
| SI_K32    | 8            | 1.4   | ≤0.5         | ≤0.4 | none                                          |                              |
| SI_K33    | 8            | 1.4   | ≤0.5         | ≤0.4 | none                                          |                              |
| SI_K34    | 4            | 0.7   | ≤0.5         | ≤0.4 | none                                          |                              |
| SI_K35    | 8            | 1.4   | ≤0.5         | ≤0.4 | CARB, β/I, ESC, FQ, AG                        | <i>bla</i> <sub>KPC</sub>    |
| SI_K36    | >64          | >11.2 | >32          | >24  | CARB, β/I, ESC, FQ, AG, COL                   | <i>bla</i> <sub>KPC</sub>    |
| SI_K37    | 16           | 2.8   | ≤0.5         | ≤0.4 | none                                          |                              |
| SI_K38    | 32           | 5.6   | ≤0.5         | ≤0.4 | none                                          |                              |
| SI_K39    | 16           | 2.8   | ≤0.5         | ≤0.4 | none                                          |                              |

|        |    |      |            |            |                                    |                             |
|--------|----|------|------------|------------|------------------------------------|-----------------------------|
| SI_K40 | 64 | 11.2 | >32        | >24        | CARB, $\beta$ /I, ESC, FQ, AG, COL | <i>bla</i> <sub>KPC</sub>   |
| SI_K41 | 8  | 1.4  | $\leq 0.5$ | $\leq 0.4$ | $\beta$ /I, ESC, FQ, AG            | ESBL                        |
| SI_K42 | 8  | 1.4  | $\leq 0.5$ | $\leq 0.4$ | none                               |                             |
| SI_K43 | 8  | 1.4  | $\leq 0.5$ | $\leq 0.4$ | none                               |                             |
| SI_K44 | 8  | 1.4  | $\leq 0.5$ | $\leq 0.4$ | none                               |                             |
| SI_K45 | 8  | 1.4  | $\leq 0.5$ | $\leq 0.4$ | FQ                                 |                             |
| SI_K46 | 32 | 5.6  | $\leq 0.5$ | $\leq 0.4$ | $\beta$ /I                         |                             |
| SI_K47 | 8  | 1.4  | $\leq 0.5$ | $\leq 0.4$ | none                               |                             |
| SI_K48 | 64 | 11.2 | $\leq 0.5$ | $\leq 0.4$ | none                               |                             |
| SI_K49 | 8  | 1.4  | $\leq 0.5$ | $\leq 0.4$ | none                               |                             |
| SI_K50 | 16 | 2.8  | $\leq 0.5$ | $\leq 0.4$ | none                               |                             |
| SI_K51 | 8  | 1.4  | $\leq 0.5$ | $\leq 0.4$ | none                               |                             |
| SI_K52 | 16 | 2.8  | $\leq 0.5$ | $\leq 0.4$ | none                               |                             |
| SI_K53 | 8  | 1.4  | $\leq 0.5$ | $\leq 0.4$ | $\beta$ /I, ESC, FQ                | ESBL                        |
| SI_K54 | 8  | 1.4  | $\leq 0.5$ | $\leq 0.4$ | none                               |                             |
| SI_K55 | 8  | 1.4  | $\leq 0.5$ | $\leq 0.4$ | $\beta$ /I, ESC, FQ, AG            | ESBL                        |
| SI_K56 | 4  | 0.7  | $\leq 0.5$ | $\leq 0.4$ | none                               |                             |
| SI_K57 | 16 | 2.8  | $\leq 0.5$ | $\leq 0.4$ | $\beta$ /I, FQ                     |                             |
| SI_K58 | 16 | 2.8  | $\leq 0.5$ | $\leq 0.4$ | none                               |                             |
| SI_K59 | 8  | 1.4  | $\leq 0.5$ | $\leq 0.4$ | none                               |                             |
| SI_K60 | 8  | 1.4  | $\leq 0.5$ | $\leq 0.4$ | none                               |                             |
| SI_K61 | 4  | 0.7  | $\leq 0.5$ | $\leq 0.4$ | CARB, $\beta$ /I, ESC, FQ          |                             |
| SI_K62 | 4  | 0.7  | $\leq 0.5$ | $\leq 0.4$ | CARB, $\beta$ /I, ESC, FQ, AG      | ESBL                        |
| SI_K63 | 8  | 1.4  | $\leq 0.5$ | $\leq 0.4$ | $\beta$ /I, ESC, FQ, AG            | ESBL                        |
| SI_K64 | 8  | 1.4  | $\leq 0.5$ | $\leq 0.4$ | none                               |                             |
| SI_K65 | 4  | 0.7  | $\leq 0.5$ | $\leq 0.4$ | none                               |                             |
| SI_K66 | 4  | 0.7  | $\leq 0.5$ | $\leq 0.4$ | $\beta$ /I, ESC, FQ, AG            | ESBL                        |
| SI_K67 | 4  | 0.7  | $\leq 0.5$ | $\leq 0.4$ | $\beta$ /I, ESC, FQ, AG            | ESBL                        |
| SI_K68 | 4  | 0.7  | $\leq 0.5$ | $\leq 0.4$ | none                               |                             |
| SI_K69 | 8  | 1.4  | $\leq 0.5$ | $\leq 0.4$ | $\beta$ /I, ESC, FQ, AG            | ESBL                        |
| SI_K70 | 4  | 0.7  | $\leq 0.5$ | $\leq 0.4$ | $\beta$ /I, ESC, FQ                |                             |
| SI_K71 | 16 | 2.8  | $\leq 0.5$ | $\leq 0.4$ | CARB, $\beta$ /I, ESC, FQ          | <i>bla</i> <sub>KPC</sub>   |
| SI_K72 | 16 | 2.8  | >32        | >24        | CARB, $\beta$ /I, ESC, FQ, AG, COL | <i>bla</i> <sub>NDM</sub>   |
| SI_K73 | 8  | 1.4  | $\leq 0.5$ | $\leq 0.4$ | CARB, ESC, FQ, AG                  | <i>bla</i> <sub>CTX-M</sub> |

<sup>a</sup> CARB, carbapenems;  $\beta$ /I,  $\beta$ -lactams/inhibitors combinations; ESC, extended-spectrum cephalosporins; FQ, fluoroquinolones; AG, aminoglycosides; COL, colistin.

<sup>b</sup> Non susceptible to at least one agent among the following tested antibiotics: CARB, imipenem and/or meropenem and/or ertapenem;  $\beta$ /I, piperacillin/tazobactam and/or amoxicillin/clavulanate; ESC, ceftazidime and/or cefotaxime and/or cefepime; AG, gentamicin and/or amikacin. Resistance phenotype towards FQ was reported in case of non-susceptibility to ciprofloxacin.

<sup>c</sup> ESBL production was deduced on the basis of the results of the ESBL screening test on automated system Vitek<sup>®</sup>2.

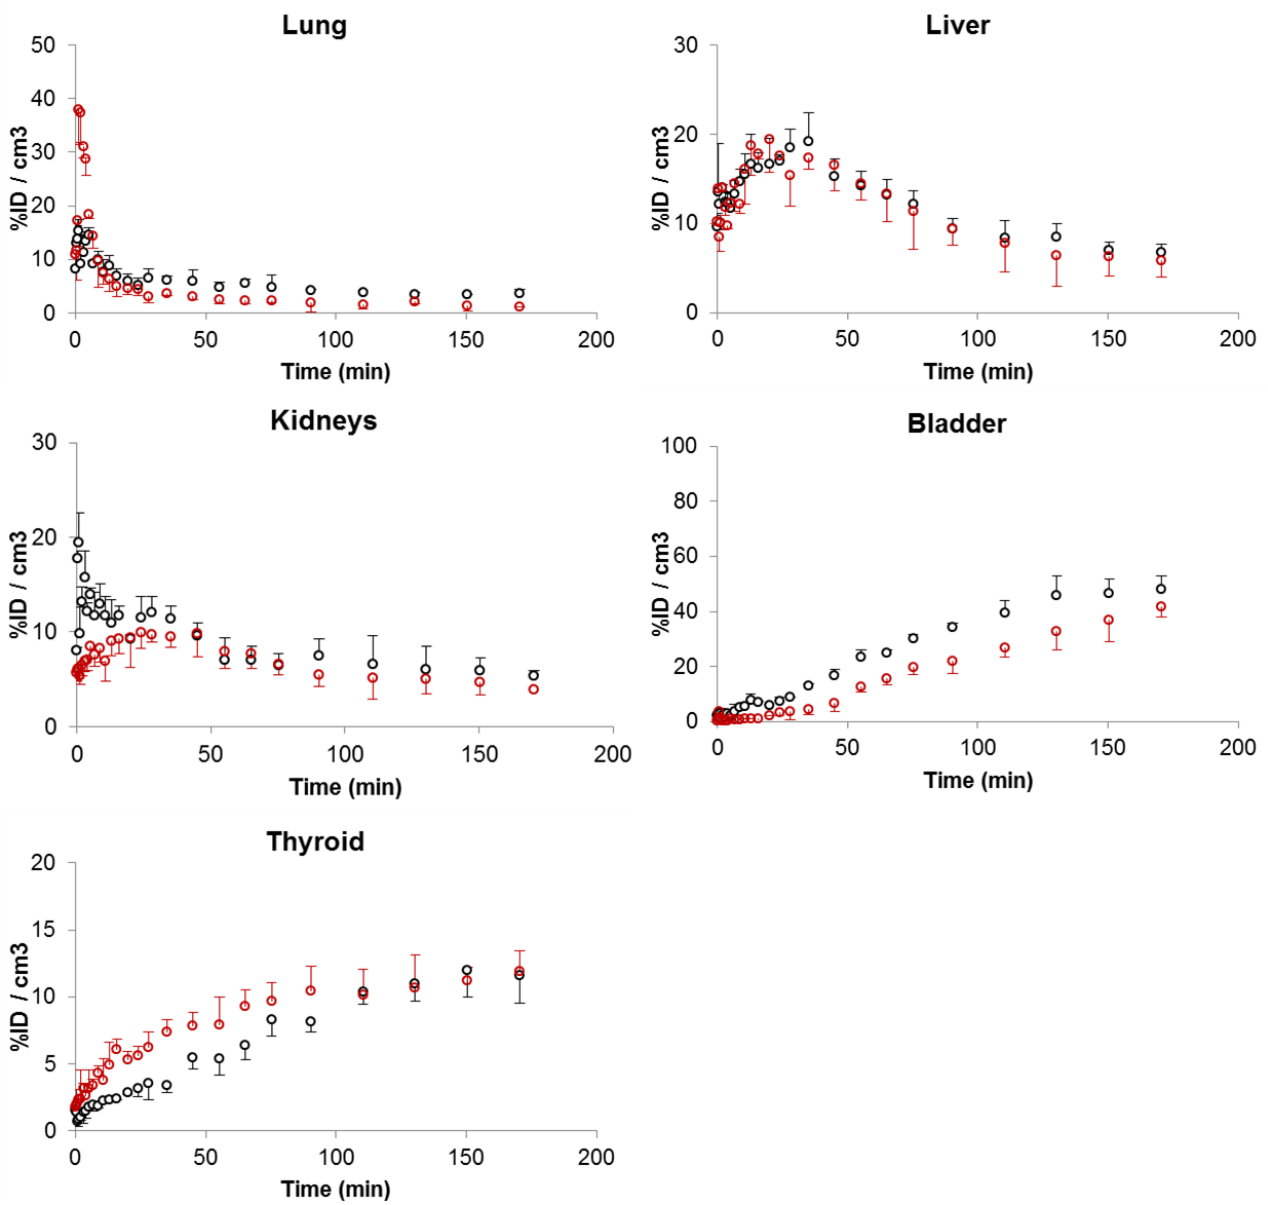

**Figure S1.** Accumulation of [<sup>124</sup>I]SET-M33L (black) and [<sup>124</sup>I]SET-M33L-PEG (red), expressed as % of injected dose per cm<sup>3</sup> of tissue, in different organs after intravenous administration, as determined by PET-CT.

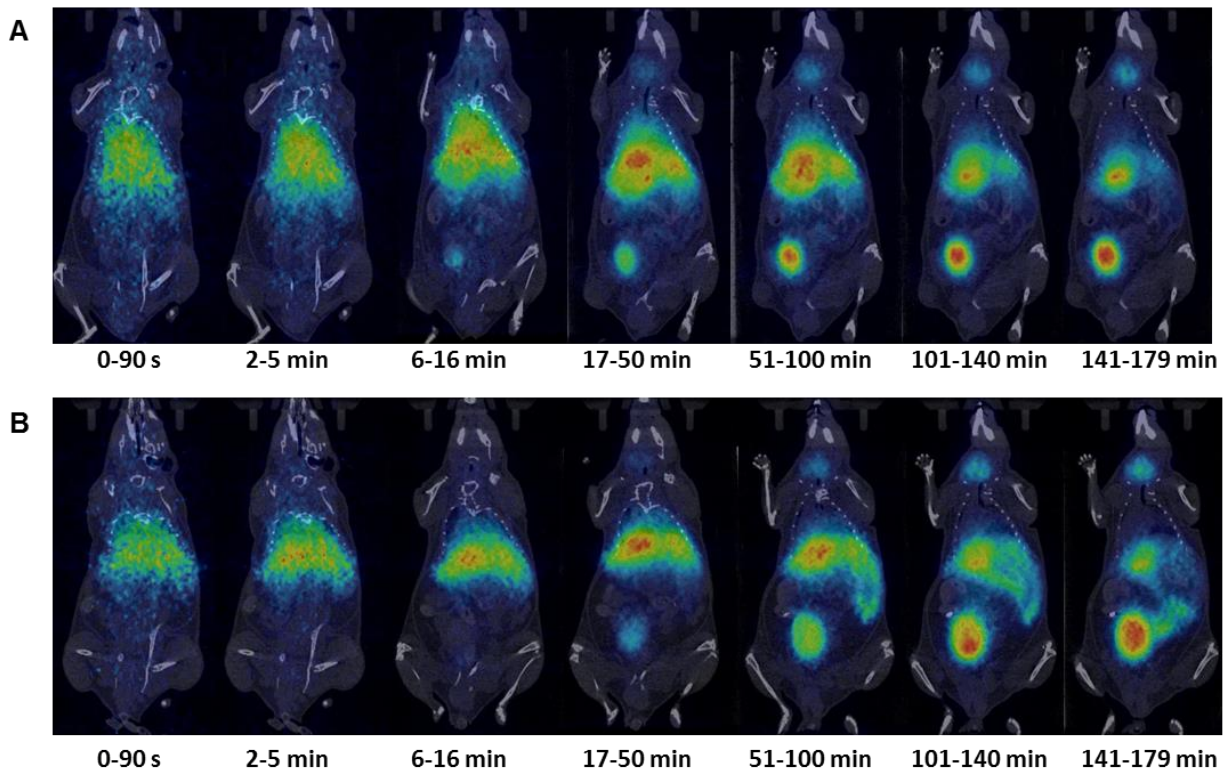

**Figure S2.** PET-CT images obtained at different times after intravenous administration of  $[^{124}\text{I}]\text{SET-M33L}$  (A) and  $[^{124}\text{I}]\text{SET-M33L-PEG}$  (B).
